# Mental Health Status among the South Indian Pharmacy Students during Covid-19 Pandemic's Quarantine Period: A Cross-Sectional Study

S VIDYADHARA<sup>1</sup>, A CHAKRAVARTHY<sup>1</sup>, A PRAMOD KUMAR<sup>1\*</sup>, C SRI HARSHA<sup>2</sup>, R RAHUL<sup>3</sup>

1. Faculty of Pharmacy, Chebrolu Hanumaiah Institute of Pharmaceutical Sciences, Guntur, Andhra Pradesh, India.
2. Faculty of Pharmacy, JSS Academy of Higher Education and Research, Mysuru, Karnataka, India.
3. Faculty of Pharmacy, KLE College of Pharmacy, Bangalore, Karnataka, India.

## Abstract

**Introduction:** The COVID-19 outbreak created a major panic among all the citizens of the country owing to its severity, contagiousness within the community, lack of specific treatment and possibility of re-infection. All these factors along with the uncertain behaviour of the virus lead to state of fear and concern all throughout the nation. The current study represents the mental health survey conducted on the students of South India after the completion of one month quarantine period of the COVID-19 outbreak.

**Methodology:** The present study is a cross-sectional, web-based online survey which consists of 21-item DASS questionnaire. This was used to assess the emotional states of depression, anxiety, and stress. Using Google Forms, the questionnaire was randomly distributed among the pharmacy students of selected colleges. Mean with standard deviation was calculated for continuous variables and the number with percentage was calculated for categorical variables.

**Results:** A total of 500 participants responded to the questionnaire. More than half of the responses were received from females (65%). On assessment it was found that, 26 % of respondents reported severe to extremely severe depressive symptoms; 31.5 % of respondents reported severe to extremely severe anxiety symptoms, and 19 % reported severe to extremely severe stress levels.

**Conclusion:** In India during the outbreak of COVID-19, an alarming number of students were found to have an impact on mental health due to the outbreak and were observed to have higher levels of stress, anxiety, and depression. The study findings show the need of conducting more such studies and can be used to prepare appropriate psychological interventions to improve mental health among the young public during the pandemic.

**Keywords:** Coronavirus, Quarantine, Mental Health, Cross sectional

## Introduction

In December 2019, a cluster of pneumonia cases of unknown cause was reported to WHO which were identified in Wuhan city, China.[1] The organism responsible for this disease was discovered as a novel coronavirus (2019 n-CoV). Based on the genetic structure of the virus it was named as Corona (meaning crown) is a group of viruses.[2] This virus was found to cause respiratory symptoms and extra-pulmonary symptoms based on the type of the coronavirus. The virus has initially spread within few cities of China and later to many other countries, which made it a pandemic.[3] Epidemic such as Severe Acute Respiratory Syndrome Coronavirus (SARS-CoV) and the Middle East Respiratory Syndrome Coronavirus (MERS-CoV) which had occurred in previous years with other coronaviruses are considered as similar kind of disease.[2]

On 11<sup>th</sup> February 2020, WHO declared the name of this disease as “COVID 19”; later the virus was renamed by the International Committee on Taxonomy of Viruses (ICTV) as Severe Acute Respiratory Syndrome Coronavirus 2 (SARS-CoV 2). Even though the novel corona virus is genetically related to the SARS-CoV outbreak of 2003 but it is of different type in several aspects.[4] The COVID-19 outbreak created a major panic among all the citizens of the country owing to its severity, contagiousness within the community, lack of specific treatment and possibility of re-infection. All these factors along with the uncertain behaviour of the virus lead to state of fear and concern all throughout the nation. The complete dynamics of transmission are yet to be determined but the general transmission of respiratory viruses happens through droplets.[3,5] Since the droplets travel approximately 1-meter in air and quickly settle on the surfaces, person to person transmission possibly occurs between close contacts. It is advised to frequently clean the hands with soap or alcohol-based sanitizers and to follow standard hygiene measures because the contaminated hands are reported to carry the virus into the body.[4, 5]

The known symptoms range from mild (cough, shortness of breath, etc) to severe (pneumonia, kidney failures, and death). Currently, there is no specific drug or vaccine, and the development of treatment and vaccines are under progress. [3] Since COVID-19 is a newly identified coronavirus, studies are going on to obtain more information about this organism as most of the data related to it is unknown. Hence all the above factors contribute to the agitation among the young generation in overall well being.

Currently, there is no much data on the mental health of the young public during the outbreak of COVID-19. This is especially relevant; uncertainty surrounding an outbreak of such a large extent. Mainly the research studies during the COVID-19 outbreak focuses on identifying the clinical features and epidemiology of infected patients [6], the genomic characterization of the virus [7], and challenges for worldwide health governance [8]. However, to our knowledge, published articles are examining the impact of COVID-19 on the young public of India.

Due to the widespread of the coronavirus in the public, the government of India has declared 21 days of lockdown in the first phase and 19 days of lockdown in the second phase for the entire country. As of lockdown, the people have to stay at home and during the lockdown, all the schools and colleges have been locked. The lockdown means isolation and to maintain social distancing to stop the spread of the infection. Sudden isolation and social distancing can significantly affect the mental health of people due to various reasons.

This study represents probably the first mental health survey conducted in the students of South India after the one month quarantine period of the COVID-19 outbreak. This study aims to find the prevalence of psychiatric symptoms among students. The results obtained may support academic institutions and healthcare professionals in safeguarding the psychological wellbeing of the students during COVID-19 outbreak expansion in all parts of India.

## **Methods:**

The present study is a cross-sectional, web-based online survey was conducted between 23rd April and 30th April 2020 (after one month period of lockdown). A 21-item DASS questionnaire was used to assess the emotional states of depression, anxiety, and stress. It is a set of three self-report scales; each of the three DASS-21 scales contains 7 items, divided into subscales with similar content.

A short form (21 items) and a long-form (42 items) which are valid and reliable measures inpatient and general population [9,10] different racial and cultural groups. This is a 21-item scale measured on a 4-point rating scale (0-3), “3” denoting “applied to me very much or most of the time” and “0” denoting “did not apply to me at all”. All the questions were provided with multiple options with only one answer to be chosen.

Using Google Forms, the questionnaire was randomly distributed among the pharmacy students of selected colleges. Through emails and WhatsApp, we requested people to circulate the survey link among their respective college mates. Participants were asked to give consent before taking part in the survey. The study ensured the confidentiality of the participant's personal information they provided. The study does not deliver any intervention to participants; thus, there is no risk of physical harm to participating individuals. This study received an exemption from the Institutional Human Ethics committee. Mean with standard deviation was calculated for continuous variables and the number with percentage was calculated for categorical variables.

### Results:

A total of 500 participants responded to the questionnaire. More than half of the responses were received from females (65%). The majority 85% of participants were from nuclear family and around 69 % are from the urban area. The age of participants ranged from 18 – 24 years; with mean (SD) age of 21.2 (+/- 1.3) years.

**Table 1: Demographic details of the study population**

| Characteristic | Category | Number of Participants (%) |
|----------------|----------|----------------------------|
| Gender         | Male     | 174 (35 %)                 |
|                | Female   | 326 (65 %)                 |
| Family Type    | Nuclear  | 426 (85 %)                 |
|                | Joint    | 74 (15 %)                  |
| Residence      | Urban    | 345 (69 %)                 |
|                | Rural    | 155 (31 %)                 |

After the country's outbreak of COVID-19, the government of India declared public health emergency of National concern, 26 % of respondents reported severe to extremely severe depressive symptoms; 31.5 % of respondents reported severe to extremely severe anxiety symptoms, and 19 % reported severe to extremely severe stress levels.

**Table 2: DASS-21; Set of questions (DQ: depression question, AQ: anxiety question, SQ: stress question), responses are rated from 0 to 3**

| Question Number | Question                                                  |
|-----------------|-----------------------------------------------------------|
| D Q 1           | I couldn't seem to experience any positive feeling at all |

|       |                                                                                                                                     |
|-------|-------------------------------------------------------------------------------------------------------------------------------------|
| D Q 2 | I found it difficult to work up the initiative to do things                                                                         |
| D Q 3 | I felt that I had nothing to look forward to                                                                                        |
| D Q 4 | I felt down-hearted and blue                                                                                                        |
| D Q 5 | I was unable to become enthusiastic about anything                                                                                  |
| D Q 6 | I felt I wasn't worth much as a person                                                                                              |
| D Q 7 | I felt that life was meaningless                                                                                                    |
| A Q 1 | I was aware of the dryness of my mouth                                                                                              |
| A Q 2 | I experienced breathing difficulty (e.g. excessively rapid breathing, breathlessness in the absence of physical exertion)           |
| A Q 3 | I experienced trembling (e.g. in the hands)                                                                                         |
| A Q 4 | I was worried about situations in which I might panic and make a fool of myself                                                     |
| A Q 5 | I felt I was close to panic                                                                                                         |
| A Q 6 | I was aware of the action of my heart in the absence of physical exertion (e.g. sense of heart rate increase, heart missing a beat) |
| A Q 7 | I felt scared without any good reason                                                                                               |
| S Q 1 | I found it hard to wind down                                                                                                        |
| S Q 2 | I tended to over-react to situations                                                                                                |
| S Q 3 | I felt that I was using a lot of nervous energy                                                                                     |
| S Q 4 | I found myself getting agitated                                                                                                     |
| S Q 5 | I found it difficult to relax                                                                                                       |
| S Q 6 | I was intolerant of anything that kept me from getting on with what I was doing                                                     |
| S Q 7 | I felt that I was rather touchy                                                                                                     |

The depression scale assesses the symptoms such as dysphoria, devaluation of life, hopelessness, self-deprecation, anhedonia, lack of interest/involvement and inertia. The anxiety scale assesses autonomic arousal, situational anxiety, skeletal muscle effects and subjective experience of anxious affect. The stress scale is sensitive to levels of chronic non-specific arousal. It assesses difficulty relaxing, nervous arousal and being easily upset/agitated, irritable / over-reactive, and impatient.

**Table 3: Scores of the scale**

|                     | <b>Normal</b> | <b>Mild</b> | <b>Moderate</b> | <b>Severe</b> | <b>Extremely severe</b> |
|---------------------|---------------|-------------|-----------------|---------------|-------------------------|
| <b>Depression</b>   | 0-9           | 10-13       | 14-20           | 21-27         | 28+                     |
| No. Respondents (%) | 287 (57.5)    | 42 (8.5)    | 40 (8)          | 41 (8)        | 90 (18)                 |
| <b>Anxiety</b>      | 0-7           | 8-9         | 10-14           | 15-19         | 20+                     |
| No. Respondents (%) | 265 (53)      | 25 (5)      | 52 (10.5)       | 20 (4)        | 138 (27.5)              |
| <b>Stress</b>       | 0-14          | 15-18       | 19-25           | 26-33         | 34+                     |
| No. Respondents (%) | 340 (68)      | 20 (4)      | 45 (9)          | 33 (6.5)      | 62 (12.5)               |

### **Discussion:**

Scores for all the 3 subsets of depression, anxiety, and stress are calculated by summing the scores obtained from the respondents for the relevant items. The DASS-21 is based on a dimensional rather than a categorical conception of psychological disorder. The assumption on which the DASS-21 development was based is that the differences between the depression, anxiety, and the stress experienced by normal subjects and clinical populations are essentially differences of degree which was confirmed by research data. This scale has no direct inferences for the distribution of patients to separate diagnostic categories proposed in classificatory systems such as the DSM and ICD.

Students were also found to have an impact on the outbreak and higher levels of stress, anxiety, and depression. As the total number of people infected by COVID-19 is rising in an alarming condition, major cities in South India have shut down all academic institutions at all levels indefinitely. The potential negative impact and uncertainty on academic development could hurt the mental health of students [11]. As young people are more receptive to digital applications [12], healthcare providers could consider providing online or smartphone-based psychological interventions and psychoeducation such as cognitive behavior therapy; to reduce the risk of negative impacts associated with the epidemic. A support network could be provided through online platforms for those people who are in quarantine during the epidemic. Health authorities need to provide needful information in a systematic format in simple languages (either audio or diagrammatic) to support the public with lower grades of educational background during the epidemic.

Though life needs stress constructively up to a certain limit and may be adequate for personality development, but if these stresses become too severe which disengage the psychic equilibrium producing maladaptive patterns of behavior. Inadequate interaction with the environment and family leads to stress and anxiety [13].

#### *This study has a few limitations*

The resources available are limited in this period and we have adopted the snowball sampling strategy for collecting the data. As a result, huge data was not collected; the conclusion was less generalizable to the entire population, particularly less diverse young public. One more limitation of the study is that self-reported levels of anxiety, depression, and stress may not always be aligned with the assessment done by trained health professionals. The study also did not assess the risk factors which might have contributed for alteration of the mental health status.

This study provides important information about the respondents on the psychological responses of 4 weeks after the outbreak of COVID-19. Our study findings directly inform the need for the developing and implementing the strategies of several psychological interventions that may help minimizing anxiety, depression, and stress during the outbreak of COVID-19. As the COVID-19 epidemic, which is still ongoing at the time of communicating this manuscript, all the interventions developed will be helpful in large extent to Indian youth.

#### **Conclusion:**

In India during the outbreak of COVID-19, around 18 % of the respondents reported extremely severe depression, and about 27.5 % of respondents reported extremely severe anxiety and about 12.5 % of respondents reported extremely severe stress. An alarming number of students were found to have an impact on mental health due to the outbreak and were observed to have higher levels of stress, anxiety, and depression. The study findings can be used to prepare psychological interventions to improve mental health among the young public during the COVID-19 epidemic.

#### **Funding:** Nil

#### **Conflicts of Interest:** None to declare

**Acknowledgment:** The authors would like to thank all the study respondents for their active participation in providing the scientific data which helps in developing strategies/interventions for building a healthy Nation.

## REFERENCES:

1. <https://www.who.int/emergencies/diseases/novel-coronavirus-2019/events-as-they-happen> [last accessed 8 April 2020].
2. <https://www.who.int/news-room/detail/08-04-2020-who-timeline---covid-19> [last accessed 15 April 2020].
3. WHO team arrives in Iran; COVID-19 surges in Korea, Italy. Center for Infectious Disease Research and Policy, 2020. (Accessed March 22, 2020, at <http://www.cidrap.umn.edu/news-perspective/2020/03/who-team-arrives-iran-covid-19-surges-korea-italy>.)
4. [https://www.who.int/emergencies/diseases/novel-coronavirus-2019/technical-guidance/naming-the-coronavirus-disease-\(covid-2019\)-and-the-virus-that-causes-it](https://www.who.int/emergencies/diseases/novel-coronavirus-2019/technical-guidance/naming-the-coronavirus-disease-(covid-2019)-and-the-virus-that-causes-it) [last accessed 15 April 2020].
5. Rubin E.J., Baden L.R., Morrissey S., Campion E.W. Medical Journals and the 2019-nCoV Outbreak. N Engl J Med. 2020;382:866.
6. [https://www.who.int/docs/default-source/coronaviruse/situation-reports/20200412-sitrep-83-covid-19.pdf?sfvrsn=697ce98d\\_4](https://www.who.int/docs/default-source/coronaviruse/situation-reports/20200412-sitrep-83-covid-19.pdf?sfvrsn=697ce98d_4) [last accessed 5 April 2020].
7. Lu, R. Genomic characterisation and epidemiology of 2019 novel coronavirus: Implications for virus origins and receptor binding. Lancet 2020.
8. Rubin, G.J.;Wessely, S. The psychological effects of quarantining a city. BMJ Clin. Res. Ed. 2020, 368, m313.
9. Henry JD and Crawford JR. “The short-form version of the Depression Anxiety Stress Scales (DASS-21): Construct validity and normative data in a large non-clinical sample”. British Journal of Clinical Psychology 44.2 (2005): 227-239.



10. Taylor R., et al. “The utility of somatic items in the assessment of depression in patients with chronic pain: a comparison of the Zung Self-Rating Depression Scale and the Depression Anxiety Stress Scales in chronic pain and clinical and community samples”. The Clinical Journal of Pain 21.1 (2005): 91-100.
11. Zhang M.W.B., Ho C.S.H., Ho R.C.M. Methodology of development and students’ perceptions of a psychiatry educational smartphone application. Technol. Health Care Off. J. Eur. Soc. Eng. Med. 2014;22:847–855. doi: 10.3233/THC-140861.
12. Do T.T.T. Receptiveness and preferences of health-related smartphone applications among Vietnamese youth and young adults. BMC Public Health. 2018;18:764. doi: 10.1186/s12889-018-5641-0.
13. Joshi R and Tomar AK. “Effect of family environment on behavioural problems and family dynamics”. Journal of Research Applied Clinical Psychology 9 (2006): 51-56.



Contributors' form (to be modified as applicable and one signed copy attached with the manuscript)

Manuscript Title: Mental Health Status among the South Indian Pharmacy Students during Covid-19 Pandemic's Quarantine Period: A Cross-Sectional Study

I/we certify that I/we have participated sufficiently in the intellectual content, conception and design of this work or the analysis and interpretation of the data (when applicable), as well as the writing of the manuscript, to take public responsibility for it and have agreed to have my/our name listed as a contributor. I/we believe the manuscript represents valid work. Neither this manuscript nor one with substantially similar content under my/our authorship has been published or is being considered for publication elsewhere, except as described in the covering letter. I/we certify that all the data collected during the study is presented in this manuscript and no data from the study has been or will be published separately. I/we attest that, if requested by the editors, I/we will provide the data/information or will cooperate fully in obtaining and providing the data/information on which the manuscript is based, for examination by the editors or their assignees. Financial interests, direct or indirect, that exist or may be perceived to exist for individual contributors in connection with the content of this paper have been disclosed in the cover letter. Sources of outside support of the project are named in the cover letter.

I/We hereby transfer(s), assign(s), or otherwise convey(s) all copyright ownership, including any and all rights incidental thereto, exclusively to this journal, in the event that such work is published by the journal. The journal shall own the work, including 1) copyright; 2) the right to grant permission to republish the article in whole or in part, with or without fee; 3) the right to produce preprints or reprints and translate into languages other than English for sale or free distribution; and 4) the right to republish the work in a collection of articles in any other mechanical or electronic format.

We give the rights to the corresponding author to make necessary changes as per the request of the journal, do the rest of the correspondence on our behalf and he/she will act as the guarantor for the manuscript on our behalf.

All persons who have made substantial contributions to the work reported in the manuscript, but who are not contributors, are named in the Acknowledgment and have given me/us their written permission to be named. If I/we do not include an Acknowledgment that means I/we have not received substantial contributions from non-contributors and no contributor has been omitted.

| Name              | Signature                                                                            | Date signed |
|-------------------|--------------------------------------------------------------------------------------|-------------|
| 1 S. VIDYADHARA   | 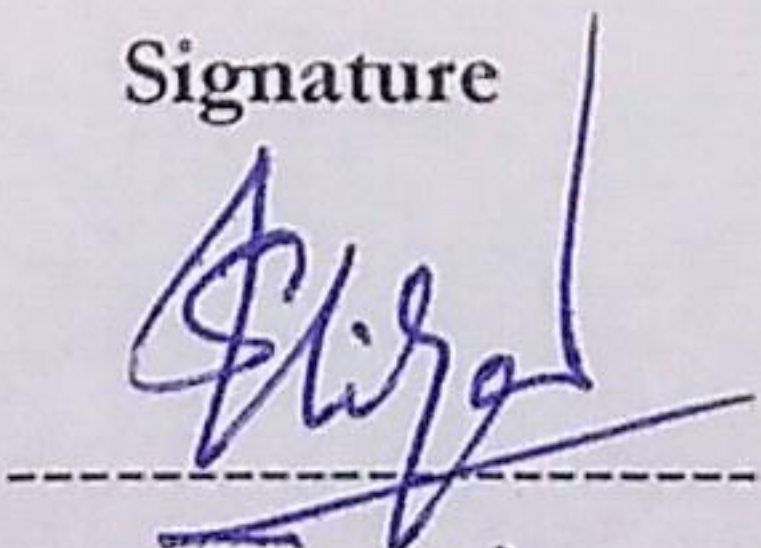 | 08-05-2020. |
| 2 A. CHAKRAVARTHY |  | 8/5/20      |
| 3 A. PRAMOD KUMAR |  | 8-5-2020.   |
| 4 C. SRI HARSHA   |  | 08-05-2020  |
| 5 R. RAHUL        |  | 8/5/2020.   |
